# Supplementary material
Source: publisher site journal article supplement (https://www.dovepress.com/article/375869)
Supplement: Supplementary file 1 [file get_supplementary_file.php]

**Table S1: Determination of minimum inhibitory concentrations (MICs) of *Mtb* strains**

| RIF-susceptibility profile | MIC µg/mL | Nucleotide change | Codon change | Amino acid substitution | No. of strains | |
| --- | --- | --- | --- | --- | --- | --- |
| RIFR strains harboring single nonsynonymous mutation/indels | | | | | | |
| R⸶ | 16 | CCAGCT 1284-1289 del | | | 1 | |
| R⸶ | 32 | AATTCATGG 1295-1303 del | | | 1 | |
| R⸶ | 8 | 1300-1302 | TTC insertion | Phe 434 ins | 1 | |
| T 3225 C | GCT → GCC | Ala 1075 Ala |
| G 3480 A | CTG → CTA | Leu 1160 Leu |
| R⸶ | 32 | A 1304 T | GAC → GTC | Asp 435 Val | 2 | |
| T 3225 C | GCT → GCC | Ala 1075 Ala |
| R | 64 | C 1305 G | GAC → GAG | Asp 435 Glu | 1 | |
| G 3480 A | CTG → CTA | Leu 1160 Leu |
| R⸶ | 32 | A 1304 G | GAC → GGC | Asp 435 Gly | 1 | |
| R⸶ | 16 | A 1309 G | AAC → GAC | Asn 437 Asp | 1 | |
| R | 64 | C 1333 G | CAC → GAC | His 445 Asp | 8 | |
| T 3225 C | GCT → GCC | Ala 1075 Ala |
| G 3480 A | CTG → CTA | Leu 1160 Leu |
| R | > 64 | C 1333 T | CAC → TAC | His 445 Tyr | 1 | |
| R | > 64 | C 327 T | GTC → GTT | Val 109 Val | 2 | |
| C 1333 T | CAC → TAC | His 445 Tyr |
| R | ≥32 | C 1333 A | CAC → AAC | His 445 Asn | 4 | |
| R⸶ | 32 | A 1334 T | CAC → CTC | His 445 Leu | 2 | |
| G 1620 C | TCG → TCC | Ser 540 Ser |
| G 1623 C | CCG → CCC | Pro 541 Pro |
| T 3225 C | GCT → GCC | Ala 1075 Ala |
| R | 64 | C 882 T | TTC → TTT | Phe 294 Phe | 4 | |
| A 1334 G | CAC → CGC | His 445 Arg |
| A 1608 G | GCA → GCG | Ala 536 Ala |
| T 3225 C | GCT → GCC | Ala 1075 Ala |
| R | > 64 | C 1349 T | TCG → TTG | Ser 450 Leu | 37 | |
| G 3480 A | CTG → CTA | Leu 1160 Leu |
| R⸶ | ≥ 64 | C 1349 T | TCG → TTG | Ser 450 Leu | 2 | |
| R⸶ | 16 | T 1355 C | CTG → CCG | Leu 452 Pro | 1 | |
| RIFR strains harboring multiple nonsynonymous mutations/indels | | | | | |
| R | 64 | C 580 T | CAC → TAC | His 194 Tyr | 1 | |
| C 1333 A | CAC → AAC | His 445 Asn |
| R | ≥ 64 | C 580 T | CAC → TAC | His 194 Tyr | 3 | |
| C 1349 T | TCG → TTG | Ser 450 Leu |
| C 2136 T | AAC → ATT | Asn 712 Asn |
| T 3225 C | GCT → GCC | Ala 1075 Ala |
| R⸶ | 16 | A 820 C | AAG → CAG | Lys 274 Gln | 1 | |
| C 897 del |  |  |
| C 1473 G | ATC → ATG | Ile 491 Met |
| T 3225 C | GCT → GCC | Ala 1075 Ala |
| R⸶ | 32 | C 857 T | GCG → GTG | Ala 286 Val | 1 | |
| T 1481 C | CTG → CCG | Leu 494 Pro |
| T3225C | GCT → GCC | Ala 1075 Ala |
| R | 64 | C 309 T | GAC → GAT | Asp 103 Asp | 1 | |
| A 1198 G | ACC → GCC | Thr 400 Ala |
| A 1304 G | GAC → GGC | Asp 435 Gly |
| R | ≥ 64 | A 1198 G | ACC → GCC | Thr 400 Ala | 2 | |
| C 1349 T | TCG → TTG | Ser 450 Leu |
| G 1687 del |  |  |
| R | > 64 | T 1270 C | TTC → CTC | Phe 424 Leu | 1 | |
| T 1289 C | CTG → CCG | Leu 430 Pro |
| A 1304 G | GAC → GGC | Asp 435 Gly |
| C 1622 A | CCG → CAG | Pro 541 Gln |
| R | > 64 | T 1270 C | TTC → CTC | Phe 424 Leu | 1 | |
| C 1349 T | TCG → TTG | Ser 450 Leu |
| R⸶ | 32 | T 1289 C | CTG → CCG | Leu 430 Pro | 1 | |
| A 1300 G | ATG → GTG | Met 434 Val |
| R | ≥ 64 | T 1289 C | CTG → CCG | Leu 430 Pro | 1 | |
| G 1303 A | GAC→ AAC | Asp 435 Asn |
| R | ≥ 64 | T 1289 C | CTG → CCG | Leu 430 Pro | 2 | |
| A 1304 G | GAC → GGC | Asp 435 Gly |
| R⸶ | 64 | T 1289 C | CTG → CCG | Leu 430 Pro | 2 | |
| C 1333 A | CAC → AAC | His 445 Asn |
| R | > 64 | T 1289 C | CTG → CCG | Leu 430 Pro | 2 | |
| C 1349 T | TCG → TTG | Ser 450 Leu |
| R⸶ | 32 | T 1289 C | CTG → CCG | Leu 430 Pro | 1 | |
| C 1473 G | ATC → ATG | Ile 491 Met |
| R | > 64 | C 1294 A | CAA → AAA | Gln 432 Lys | 1 | |
| A 1334 G | CAC → CGC | His 445 Arg |
| R⸶ | > 64 | C 1294 A | CAA → AAA | Gln 432 Lys | 1 | |
| C 1333 G | CAC → GAC | His 445 Asp |
| R | 64 | A 1304 T | GAC → GTC | Asp 435 Val | 1 | |
| A 1309 G | AAC → GAC | Asn 437 Asp |
| A 2018 G | AAC → AGC | Asn 673 Ser |
| R | > 64 | A 1304 T | GAC → GTC | Asp 435 Val | 1 | |
| A 1309 G | AAC → GAC | Asn 437 Asp |
| C 1349 T | TCG → TTC | Ser 450 Phe |
| G 1350 C |
| R⸶ | ≥ 64 | A 1304 T | GAC → GTC | Asp 435 Val | 1 | |
| A 1309 G | AAC → GAC | Asn 437 Asp |
| R | ≥ 64 | C 1305 G | GAC → GAG | Asp 435 Glu | 5 | |
| C 1333 A | CAC → AAC | His 445 Asn |
| R | > 64 | C 1305 G | GAC → GAG | Asp 435 Glu | 1 | |
| C 1333 G | CAC → GAC | His 445 Asp |
| R | > 64 | C 1305 G | GAC → GAG | Asp 435 Glu | 1 | |
| C 1349 T | TCG → TTG | Ser 450 Leu |
| R | > 64 | A 1304 G | GAC → GGC | Asp 435 Gly | 1 | |
| G 1343 T | CGA → CTA | Arg 448 Leu |
| R | > 64 | A 1309 G | AAC → GAC | Asn 437 Asp | 1 | |
| C 1349 T | TCG → TTG | Ser 450 Leu |
| R | > 64 | A 1334 G | CAC → CGC | His 445 Arg | 1 | |
| G 1343 T | CGA → CTA | Arg 448 Leu |
| R | > 64 | C 1333 T | CAC → TAC | His 445 Tyr | 1 | |
| C 1349 T | TCG → TTG | Ser 450 Leu |
| R | > 64 | C 1333 G | CAC → GAC | His 445 Asp | 1 | |
| C 1349 T | TCG → TTG | Ser 450 Leu |
| R⸶ | ≥ 64 | C 1333 T | CAC → TAC | His 445 Tyr | 1 | |
| C 1361 T | CCC → CTC | Pro 454 Leu |
| R | > 64 | G 1343 T | CGA → CTA | Arg 448 Leu | 1 | |
| C 1349 T | TCG → TTG | Ser 450 Leu |
| R⸶ | 4 | C 1361 T | CCC → CTC | Pro 454 Leu | 1 | |
| G 1687 del |  |  |
| R⸶ | 16 | TT 1835-6 ins |  |  | 1 | |
| A 1471 C | ATC → CTC | Ile 491 Leu |
| R | 64 | C 1333 A | CAC → AAC | His 445 Asn | 2 | |
| A 1471 C | ATC → CTC | Ile 491 Leu |
| R | > 64 | C 1349 T | TCG → TTG | Ser 450 Leu | 1 | |
| A 1471 C | ATC → CTC | Ile 491 Leu |
| R⸶ | 64 | A 1304 T | GAC → GTC | Asp 435 Val | 1 | |
| T 1481 C | CTG → CCG | Leu 494 Pro |
| R⸶ | 32 | T 1289 C | CTG → CCG | Leu 430 Pro | 1 | |
| C 1622 A | CCG → CAG | Pro 541 Gln |
| R⸶ | 32 | A 1304 T | GAC → GTC | Asp 435 Val | 1 | |
| C 1622 A | CCG → CAG | Pro 541 Gln |
| R | ≥ 64 | C 1349 T | TCG → TTG | Ser 450 Leu | 6 | |
| C 1622 A | CCG → CAG | Pro 541 Gln |
| T 3225 C | GCT → GCC | Ala 1075 Ala |
| R⸶ | 64 | C 1333 G | CAC → GAC | His 445 Asp | 1 | |
| C 1622 A | CCG → AAG | Pro 541 Lys |
| R | > 64 | C 1349 T | TCG → TTG | Ser 450 Leu | 1 | |
| C 1621 A | CCG → AAG | Pro 541 Lys |
| C 1622 A |
| R | 64 | G 1303 A | GAC → AAC | Asp 435 Asn | 1 | |
| C 1621 A | CCG → ACG | Pro 541 Thr |
| A 2018 G | AAC → AGC | Asn 673 Ser |
| R | 64 | C 1333 G | CAC → GAC | His 445 Asp | 1 | |
| C 1621 A | CCG → ACG | Pro 541 Thr |
| R | > 64 | C 1349 T | TCG → TTG | Ser 450 Leu | 2 | |
| C 1621 A | CCG → ACG | Pro 541 Thr |
| R⸶ | 32 | A 1304 T | GAC → GTC | Asp 435 Val | 1 | |
| A 1624 G | ATC → GGC | Ile 542 Gly |
| T 1625 G |
| A 2018 G | AAC → AGC | Asn 673 Ser |
| R | > 64 | C 1349 T | TCG → TTG | Ser 450 Leu | 1 | |
| A 1623 ins |  |  |
| T 1625 G | ATC → AGC | Ile 542 Ser |
| R | > 64 | C 1294 A | CAA → AAA | Gln 432 Lys | 1 | |
| C 1333 G | CAC → GAC | His 445 Asp |
| T 1658 C | GTG→ GCG | Val 553 Ala |
| R⸶ | 32 | A 1304 T | GAC → GTC | Asp 435 Val | 1 | |
| G 1670 A | CGC → CAC | Arg 557 His |
| R | 64 | C 1349 T | TCG → TTG | Ser 450 Leu | 1 | |
| G 1670 A | CGC → CAC | Arg 557 His |
| R | > 64 | C 813 T | ATC → ATT | Ile 271 Ile | 1 | |
| G 1303 A | GAC → AAC | Asp 435 Asn |
| A 1673 C | AAG → ACG | Lys 558 Thr |
| R | > 64 | A 1304 T | GAC → GTC | Asp 435 Val | 1 | |
| C 1333 A | CAC → AAC | His 445 Asn |
| A 1673 C | AAG → ACG | Lys 558 Thr |
| R⸶ | 64 | T 1289 C | CTG → CCG | Leu 430 Pro | 1 | |
| C 1333 A | CAC → AAC | His 445 Asn |
| G 1687 del |  |  |
| C 1736 A | ACG →AAC | Thr 579 Asn |
| G 1737 C |
| R | > 64 | C 1349 T | TCG → TTG | Ser 450 Leu | 1 | |
| C 1305 G | GAC → GAG | Asp 435 Glu |
| A 2018 G | AAC → AGC | Asn 673 Ser |
| R | > 64 | C 1349 T | TCG → TTG | Ser 450 Leu | 1 | |
| T 2192 C | CTG → CCG | Leu 731 Pro |
| T 3225 C | GCT → GCC | Ala 1075 Ala |
| R⸶ | 32 | C 1305 G | GAC → GAG | Asp 435 Glu | 1 | |
| C 2235 G | CAC → CAG | His 745 Gln |
| A 3316 G | ATC → GTC | Ile 1106 Val |
| R | 64 | C 1333 T | CAC → TAC | His 445 Tyr | 2 | |
| C 2235 G | CAC → CAG | His 745 Gln |
| R⸶ | 16 | T 1355 C | CTG → CCG | Leu 452 Pro | 1 | |
| C 3043 ins |  |  |
| T3225C | GCT→ GCC | Ala 1075 Ala |
| R⸶ | 16 | T 1289 C | CTG → CCG | Leu 430 Pro | 1 | |
| A 3316 G | ATC → GTC | Ile 1106 Val |
| R | ≥ 64 | C 1349 T | TCG → TTG | Ser 450 Leu | 2 | |
| A 3316 G | ATC → GTC | Ile 1106 Val |
| R⸶ | 64 | C 1349 T | TCG → TTG | Ser 450 Leu | 2 | |
| T3225C | GCT → GCC | Ala 1075 Ala |
| G 3485 A | CGC → CAC | Arg 1162 His |
| R | > 64 | A 1300 G | ATG → GTG | Met 434 Val | 1 | |
| C 1333 T | CAC → TAC | His 445 Tyr |
| R⸶ | 32 | A 1304 T | GAC → GTC | Asp 435 Val | 2 | |
| G 3496 C | GCA → ACA | Ala 1166 Thr |
| R | 64 | C 1333 G | CAC → GAC | His 445 Asp | 1 | |
| G 1687 del |  |  |
| R⸶ | 16 | T 1355 C | CTG → CCG | Leu 452 Pro | 1 | |
| T 3225 C | GCT → GCC | Ala 1075 Ala |
| G 3496 C | GCA → ACA | Ala 1166 Thr |
| RIFS strains | | | | | | |
| S | ˂ 0.5 | No mutation | | | 12 | |
| S | ˂ 0.5 | G 1662 T | CTG → CTT | Leu 554 Leu | 2 | |
| T 3225 C | GCT → GCC | Ala 1075 Ala |
| G 3496 C | GCA → ACA | Ala 1166 Thr |
| S | ˂ 0.5 | T 3225 C | GCT → GCC | Ala 1075 Ala | 5 | |
| S | ˂ 0.5 | G 3480 A | CTG → CTA | Leu 1160 Leu | 1 | |
| CG 3484-3485 AA | CGC → AAC | Arg 1162 Asn |
| S | ˂ 0.5 | G 3480 A | CTG → CTA | Leu 1160 Leu | 1 | |
| G 3485 A | CGC → CAC | Arg 1162 His |
| G 3496 C | GCA → ACA | Ala 1166 Thr |
| S | ˂ 0.5 | AA 3487-3488 CG | AAC → CGC | Asn 1163 Arg | 1 | |
| G 3496 C | GCA → ACA | Ala 1166 Thr |
| S | ˂ 0.5 | A 3488 G | AAC → AGC | Asn 1163 Ser | 1 | |
| G 3496 C | GCA → ACA | Ala 1166 Thr |
| S | ˂ 0.5 | AA 3491-3492 GT | GAA → GGT | Glu 1164 Gly | 1 | |
| G 3496 C | GCA → ACA | Ala 1166 Thr |
| S | ˂ 0.5 | G 3480 A | CTG → CTA | Leu 1160 Leu | 1 | |
| T 3501 G | AGT → AGG | Ser 1167 Arg |

R: Resistant; S: Susceptible; ins: Insertion; del: deletion;R⸶ RIFR/rifabutin-susceptible
